# Supplementary material for: Ultrasensitive electrochemical sensing platform for miRNA-21 detection based on manganese dioxide-gold nanoparticle nanoconjugates coupled with hybridization chain reaction and horseradish peroxidase signal amplification
Source: Royal Society of Chemistry journal article supplement (doi:10.1039/d3an00490b), 2023-01-01
Supplement: d3an00490b1.pdf [file d3an00490b1.pdf]

Untrasensitive electrochemical sensing platform for miRNA-21 detection based on manganese dioxide-gold nanoparticles nanoconjugates coupling with hybridization chain reaction and horseradish peroxidase signal amplification

Mengyao Li, Tingting Zhang, Yuzhong Zhang\*

*College of Chemistry and Materials Science, Anhui Key Laboratory of Chem-Biosensing, Anhui*

*Normal University, Wuhu 241002, People's Republic of China*

---

\* Corresponding author. Tel: +86 553 3869303; Fax: +86 553 3869303

E-mail address: [zhyz65@mail.ahnu.edu.cn](mailto:zhyz65@mail.ahnu.edu.cn) (Y. Zhang)

| Oligonucleotides                                    | Sequences (5'-3')                                                                              |
|-----------------------------------------------------|------------------------------------------------------------------------------------------------|
| Hairpin probe (HP)                                  | HS-SH-(CH <sub>2</sub> ) <sub>6</sub> -ATT GGA TCA ACA TCA GTC TGA TAA<br>GCT ATC CAA T        |
| Hairpin probe (HP <sub>2</sub> )                    | HS-SH-(CH <sub>2</sub> ) <sub>6</sub> -CCG GGT TCA ACA TCA GTC TGA TAA<br>GCT AAC CCG G-Biotin |
| Target sequence (microRNA-21)                       | UAG CUU AUC AGA CUG AUG UUG A                                                                  |
| Signal sequence (S <sub>1</sub> )                   | CCG TTC CGA GTT GTG TCC AAT CTA CAT GGA-Biotin                                                 |
| Auxiliary sequence (S <sub>2</sub> )                | AGG TTA GAT GTA CCT GGC AAG GCT CAA CAC                                                        |
| Single base C mismatched sequence (N <sub>1</sub> ) | UAG CUU AU <u>A</u> AGA CUG AUG UUG A                                                          |
| Single base G mismatched sequence (N <sub>2</sub> ) | UAG CUU AUC A <u>C</u> A CUG AUG UUG A                                                         |
| Single base A mismatched sequence (N <sub>3</sub> ) | UAG CUU AUC <u>G</u> GA CUG AUG UUG A                                                          |
| Noncomplementary sequence (N <sub>4</sub> )         | GUC AGG CGU CCU GCA ACC GGU A                                                                  |

Table S1 Sequence information of DNA and RNA

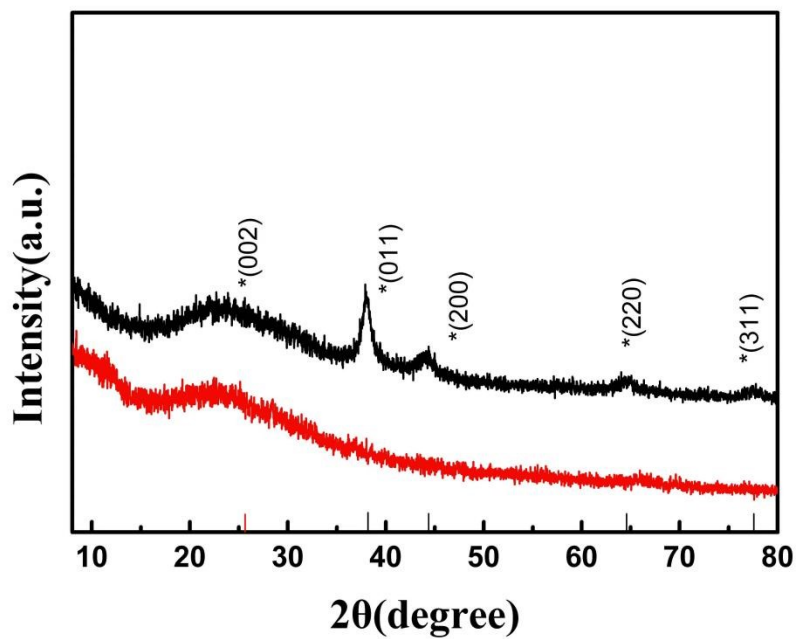

Fig.S1. XRD patterns of MnO<sub>2</sub> (red) and MnO<sub>2</sub>- Au NPs nanoconjugates (black)

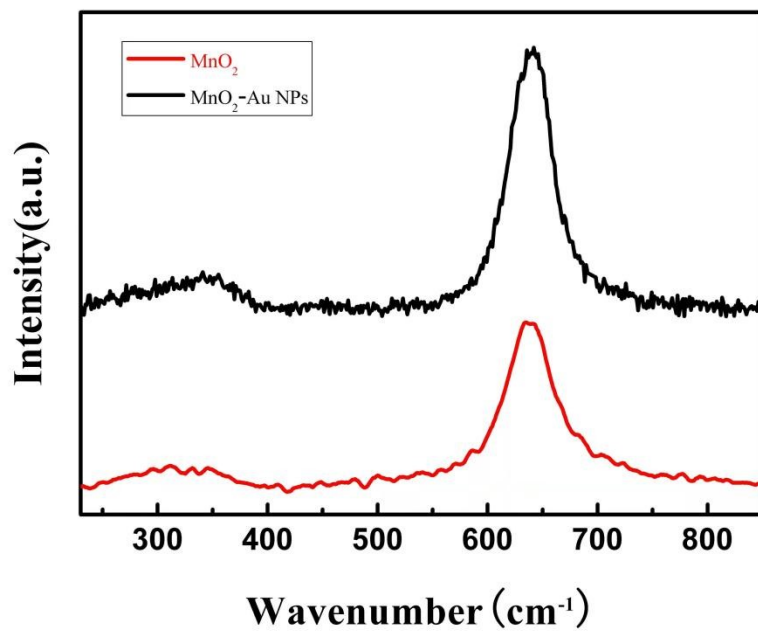

Fig S2 Raman curves of MnO<sub>2</sub> NS (red) and MnO<sub>2</sub>- Au NPs nanoconjugates

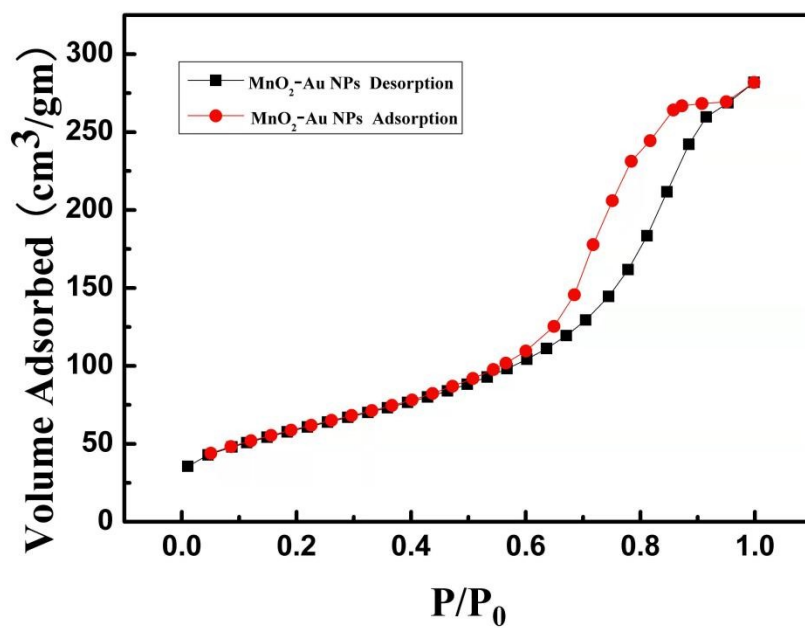

Fig S3 Desorption (black) and adsorption(red) curve of MnO<sub>2</sub> - Au NPs nanoconjugates
